# Supplementary material
Source: Research Square preprint supplement (doi:10.21203/rs.3.rs-9496758/v1)
Supplement: Supplementary file 1 [file 0ead2b03639fe7f4f28a3986.docx]

**Table 1** Experimental Animals and Measured Impact Velocity in Each Group

(Mean ± SD)

| **Groups (n)** | **40m/s-30g (6)** | **60m/s-30g (6)** | **80m/s-30g (6)** | **100m/s-30g (4)** |
| --- | --- | --- | --- | --- |
| Quality (kg) | 24.52±0.83 | 25.65±1.97 | 25.50±1.08 | 25.15±0.91 |
| Measured Speed (m/s) | 40.37±1.90 | 60.42±2.98 | 75.73±2.82 | 94.17±2.79 |
