# Supplementary material
Source: Research Square preprint supplement (doi:10.21203/rs.3.rs-9496758/v1)
Supplement: Supplementary file 2 [file 76306b827d84040a6551aab1.pdf]

Animal Science and Technology Ethics Committee

Air Force Medical University

Ethics Committee Approval No.: 20250063

|                                                                                                                                                                                                                                                                                                                                                                                                                                                                                                                                                                                                                                                                                                                                                                                                                                                                                                                                                                                                                                                                                                                                                                                                                                                                                                                                                                                                                                                                                                                                                                                                                           |                                                                                                                                                                                                                                                                                                                                                                                                              |                   |                                    |                    |             |
|---------------------------------------------------------------------------------------------------------------------------------------------------------------------------------------------------------------------------------------------------------------------------------------------------------------------------------------------------------------------------------------------------------------------------------------------------------------------------------------------------------------------------------------------------------------------------------------------------------------------------------------------------------------------------------------------------------------------------------------------------------------------------------------------------------------------------------------------------------------------------------------------------------------------------------------------------------------------------------------------------------------------------------------------------------------------------------------------------------------------------------------------------------------------------------------------------------------------------------------------------------------------------------------------------------------------------------------------------------------------------------------------------------------------------------------------------------------------------------------------------------------------------------------------------------------------------------------------------------------------------|--------------------------------------------------------------------------------------------------------------------------------------------------------------------------------------------------------------------------------------------------------------------------------------------------------------------------------------------------------------------------------------------------------------|-------------------|------------------------------------|--------------------|-------------|
| Project Name                                                                                                                                                                                                                                                                                                                                                                                                                                                                                                                                                                                                                                                                                                                                                                                                                                                                                                                                                                                                                                                                                                                                                                                                                                                                                                                                                                                                                                                                                                                                                                                                              | Study on Biological Injury Effects of Non-Lethal Kinetic Energy Weapons (No.2019-JCJQ-ZD-115-00-02), Feasibility and Application of Electrical Impedance Tomography for Monitoring Blood Perfusion                                                                                                                                                                                                           |                   |                                    |                    |             |
| Applying Department                                                                                                                                                                                                                                                                                                                                                                                                                                                                                                                                                                                                                                                                                                                                                                                                                                                                                                                                                                                                                                                                                                                                                                                                                                                                                                                                                                                                                                                                                                                                                                                                       | Department of Medical Electronic Engineering, Military Biomedical Engineering Department                                                                                                                                                                                                                                                                                                                     | Project Principal | Xuetao Shi                         | Professional Title | Professor   |
|                                                                                                                                                                                                                                                                                                                                                                                                                                                                                                                                                                                                                                                                                                                                                                                                                                                                                                                                                                                                                                                                                                                                                                                                                                                                                                                                                                                                                                                                                                                                                                                                                           |                                                                                                                                                                                                                                                                                                                                                                                                              | Project Contact   | Junyao Li                          | Tel                | 18844216229 |
| Review Type                                                                                                                                                                                                                                                                                                                                                                                                                                                                                                                                                                                                                                                                                                                                                                                                                                                                                                                                                                                                                                                                                                                                                                                                                                                                                                                                                                                                                                                                                                                                                                                                               | <input checked="" type="checkbox"/> Initial Review; <input type="checkbox"/> Re-review; <input type="checkbox"/> Amendment Review;<br><input type="checkbox"/> Regular/Annual Follow-up Review; <input type="checkbox"/> Completion Review;                                                                                                                                                                  |                   |                                    |                    |             |
| Review Date                                                                                                                                                                                                                                                                                                                                                                                                                                                                                                                                                                                                                                                                                                                                                                                                                                                                                                                                                                                                                                                                                                                                                                                                                                                                                                                                                                                                                                                                                                                                                                                                               | April 8, 2025                                                                                                                                                                                                                                                                                                                                                                                                | Review Location   | Conference Room 1/F, Animal Center |                    |             |
| Review Method                                                                                                                                                                                                                                                                                                                                                                                                                                                                                                                                                                                                                                                                                                                                                                                                                                                                                                                                                                                                                                                                                                                                                                                                                                                                                                                                                                                                                                                                                                                                                                                                             | <input checked="" type="checkbox"/> Meeting Review; <input type="checkbox"/> Emergency Meeting Review; <input type="checkbox"/> Simplified Review                                                                                                                                                                                                                                                            |                   |                                    |                    |             |
| Voting Result                                                                                                                                                                                                                                                                                                                                                                                                                                                                                                                                                                                                                                                                                                                                                                                                                                                                                                                                                                                                                                                                                                                                                                                                                                                                                                                                                                                                                                                                                                                                                                                                             | Members Due (10); Members Present (10); Voting Members (10); Recused Members (0) Committee Vote: Approve (10), Disapprove (0)                                                                                                                                                                                                                                                                                |                   |                                    |                    |             |
| Review Conclusion                                                                                                                                                                                                                                                                                                                                                                                                                                                                                                                                                                                                                                                                                                                                                                                                                                                                                                                                                                                                                                                                                                                                                                                                                                                                                                                                                                                                                                                                                                                                                                                                         | <input type="checkbox"/> Approve ; <input checked="" type="checkbox"/> Approve with Modifications; <input type="checkbox"/> Re-review with Modifications;<br><input type="checkbox"/> Disapprove; <input type="checkbox"/> Suspend or Terminate the Approved Experiment                                                                                                                                      |                   |                                    |                    |             |
| Annual/Regular Follow-up Review                                                                                                                                                                                                                                                                                                                                                                                                                                                                                                                                                                                                                                                                                                                                                                                                                                                                                                                                                                                                                                                                                                                                                                                                                                                                                                                                                                                                                                                                                                                                                                                           | <input checked="" type="checkbox"/> Yes ; <input type="checkbox"/> No                                                                                                                                                                                                                                                                                                                                        |                   |                                    |                    |             |
| Follow-up Review Frequency                                                                                                                                                                                                                                                                                                                                                                                                                                                                                                                                                                                                                                                                                                                                                                                                                                                                                                                                                                                                                                                                                                                                                                                                                                                                                                                                                                                                                                                                                                                                                                                                | <input type="checkbox"/> 3 months; <input checked="" type="checkbox"/> 6 months; <input type="checkbox"/> 12 months; <input type="checkbox"/> No                                                                                                                                                                                                                                                             |                   |                                    |                    |             |
| <p><b>Review Comments:</b><br/>           Upon review by this Ethics Committee, the comments are as follows:<br/>           1. The sequence of the use license numbers is inconsistent and the use license is incorrect; please verify and revise it.<br/>           2. The shock injury threshold of sheep is closer to that of humans. Please further clarify the necessity and scientificity of using primate monkeys.</p> <p>Approval is granted for the conduct of the project research in accordance with the approved animal experiment protocol. Researchers are required to strictly abide by the 3R Principles for animal experiments, voluntarily comply with the relevant national laws and regulations, and conduct the experimental research in accordance with the protocol approved by the Ethics Committee. Please note the following matters during the research process:<br/>           1. Any changes to the animal experiment protocol shall be promptly submitted to the Ethics Committee as an amended protocol for review and filing;<br/>           2. Voluntarily submit a written report in accordance with the annual/regular follow-up review frequency;<br/>           3. Upon completion of the animal experiment research, a scientific and technological ethics summary report must be submitted.</p> <p style="text-align: center;">Animal Science Department, Air Force Medical University<br/>           Signature of the Chairperson of the Ethics Committee:<br/> <br/>           2025年4月9日</p> |                                                                                                                                                                                                                                                                                                                                                                                                              |                   |                                    |                    |             |
| Statement:                                                                                                                                                                                                                                                                                                                                                                                                                                                                                                                                                                                                                                                                                                                                                                                                                                                                                                                                                                                                                                                                                                                                                                                                                                                                                                                                                                                                                                                                                                                                                                                                                | The attending committee members shall keep the reviewed research content confidential and have no conflicts of interest with this project. This approval document is valid for two years and shall be automatically invalid upon expiration. This Ethics Committee abides by the relevant laws and regulations in terms of its responsibilities, composition of personnel, operating procedures and records. |                   |                                    |                    |             |
